# Supplementary material for: Deleterious mutation accumulation and the long-term fate of chromosomal inversions
Source: PubMed Central journal article supplement (PMC7963061; doi:10.1371/journal.pgen.1009411), 2021-03-04
Supplement: pgen.1009411.s001.pdf [file pgen.1009411.s001.pdf]

**A****Raw Distribution**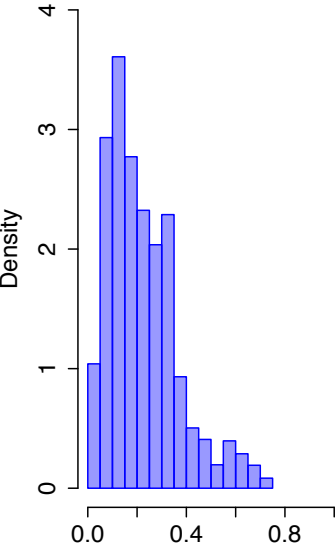**B****Sampled Unweighted Distribution**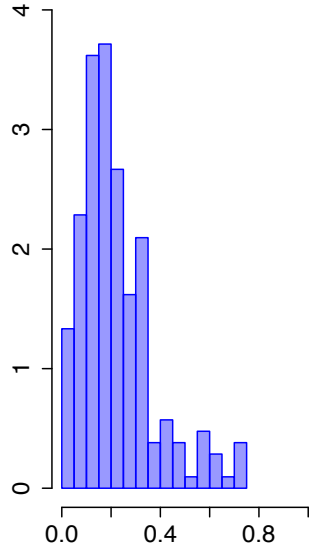**C****Sampled Weighted distribution**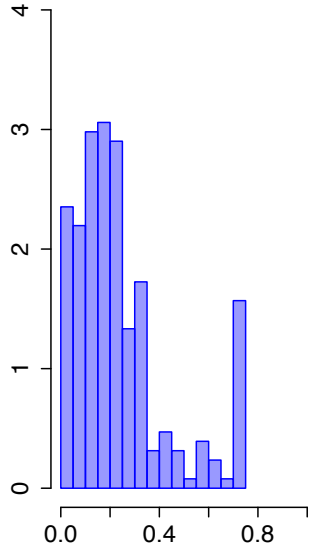

Initial mutational load of the inverted arrangement
