# Supplementary material for: Deleterious mutation accumulation and the long-term fate of chromosomal inversions
Source: PubMed Central journal article supplement (PMC7963061; doi:10.1371/journal.pgen.1009411), 2021-03-04

A

Distribution of time of loss  
of the inversion without GC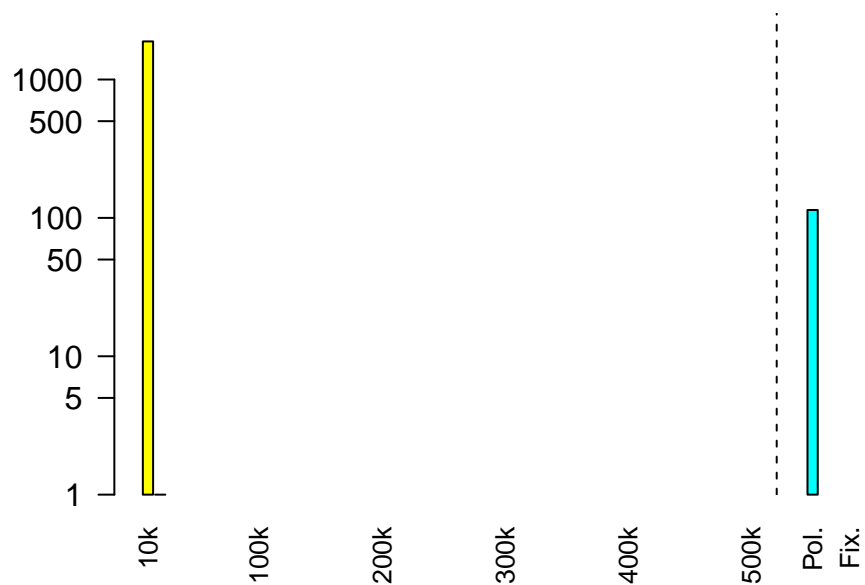

B

Distribution of time of loss  
of the inversion with GC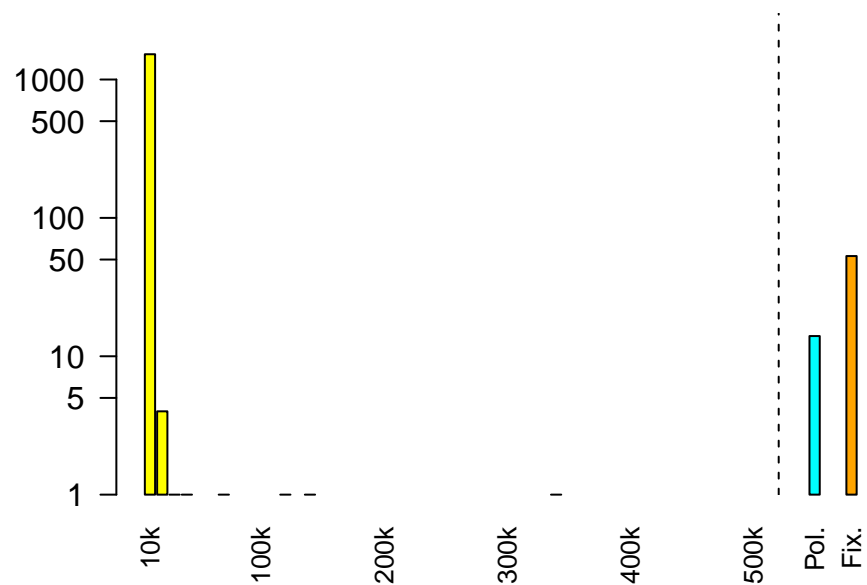

C

Distribution of time of loss  
of the inversion without GC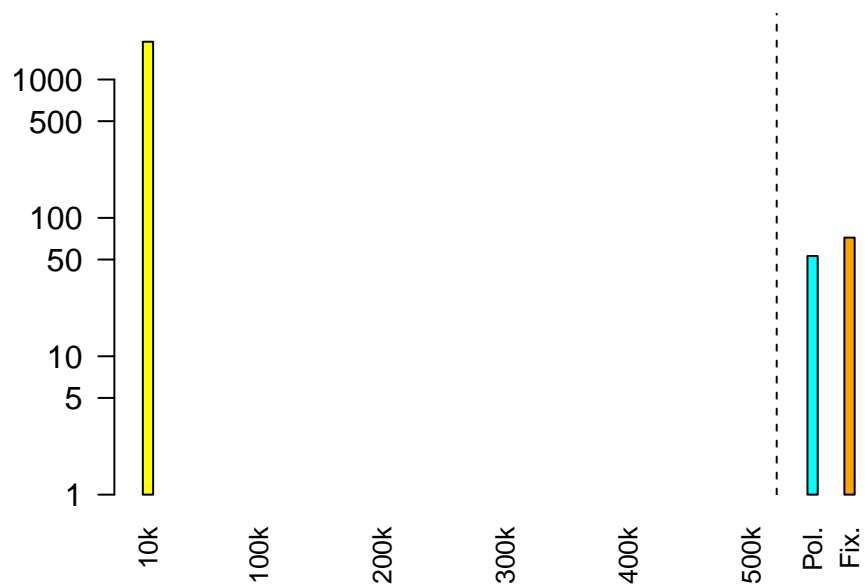

D

Distribution of time of loss  
of the inversion with GC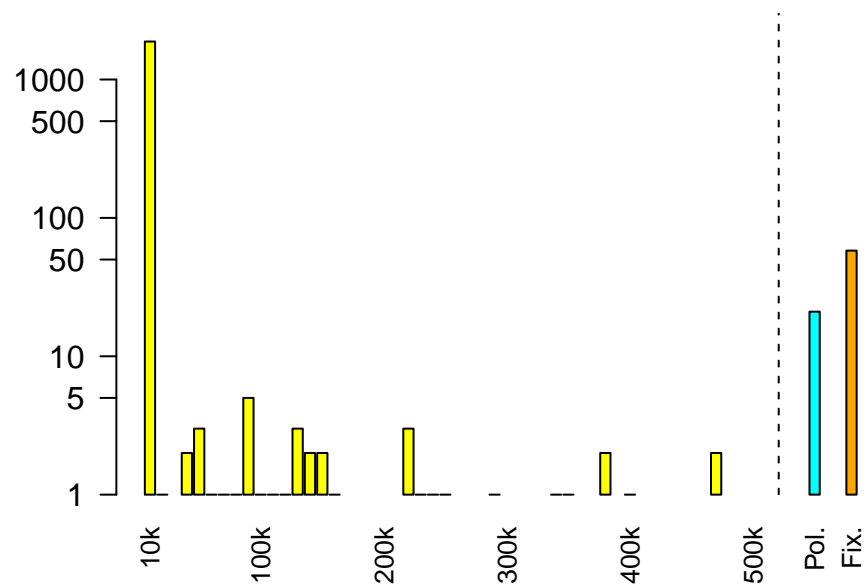

Supplement: pgen.1009411.s004.pdf [file pgen.1009411.s004.pdf]
