# Supplementary material for: Deleterious mutation accumulation and the long-term fate of chromosomal inversions
Source: PubMed Central journal article supplement (PMC7963061; doi:10.1371/journal.pgen.1009411), 2021-03-04

**A**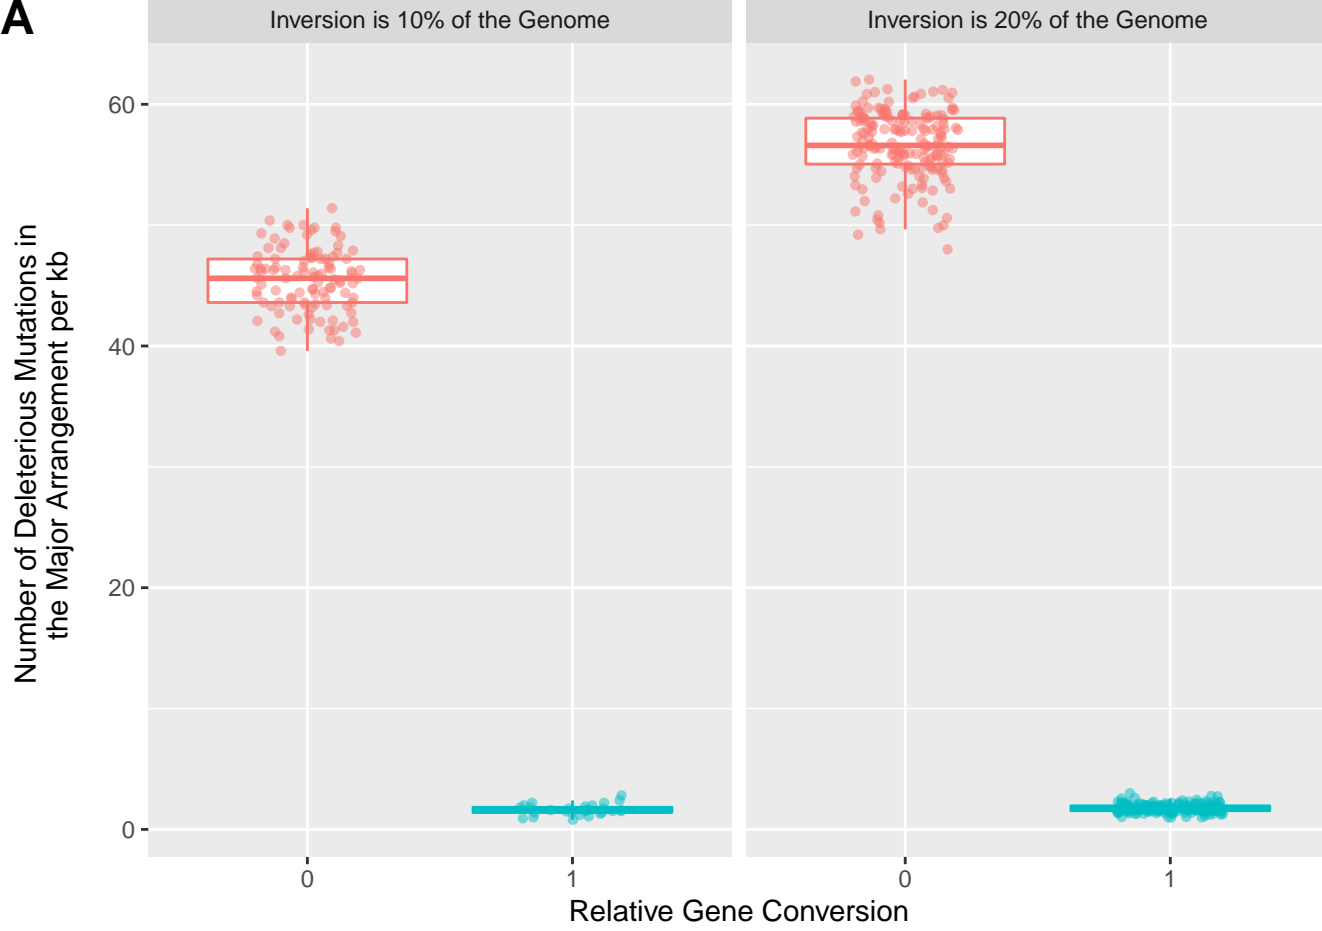**B**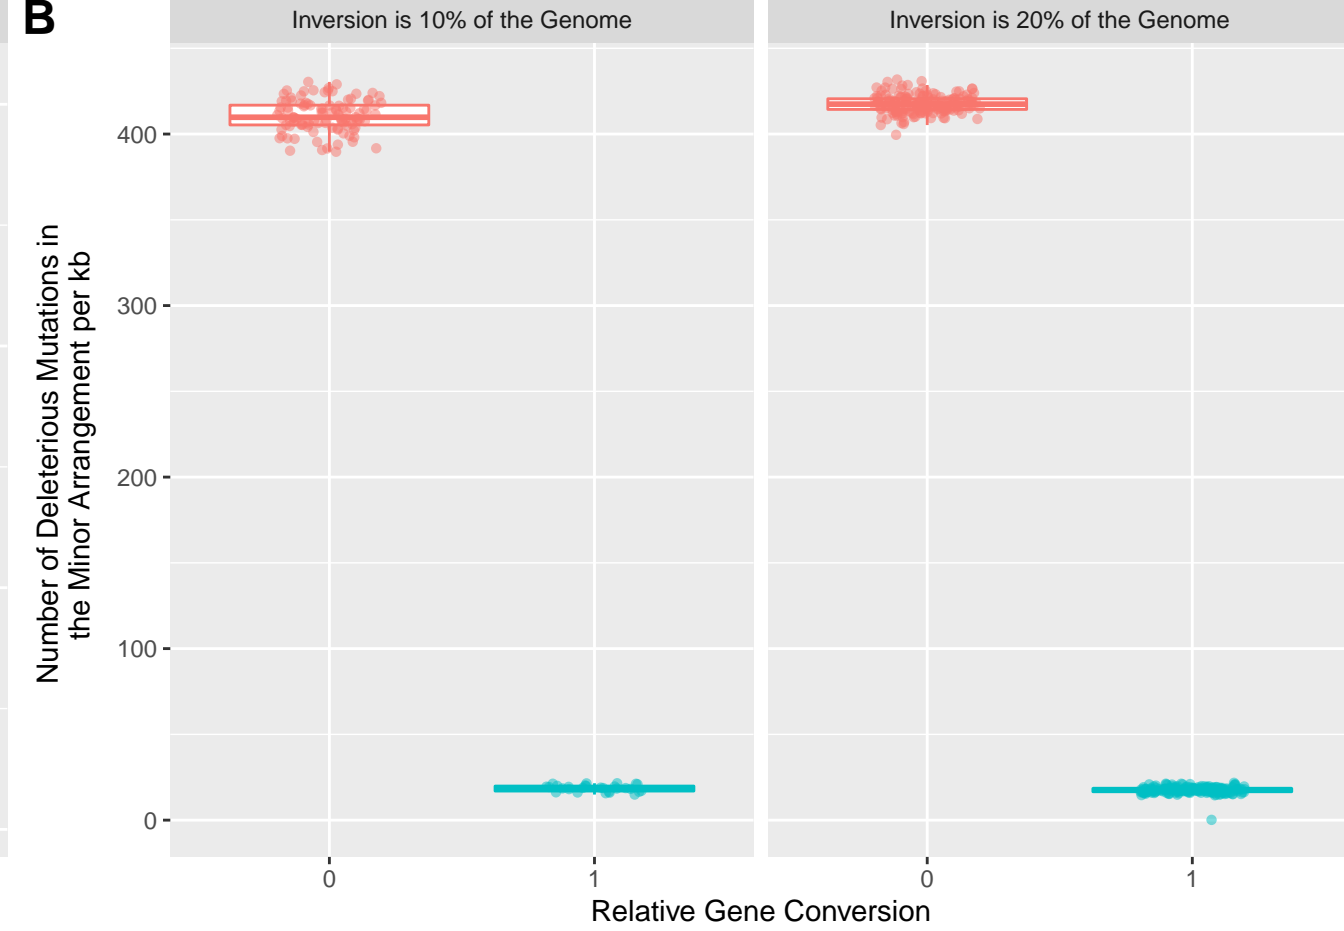**C**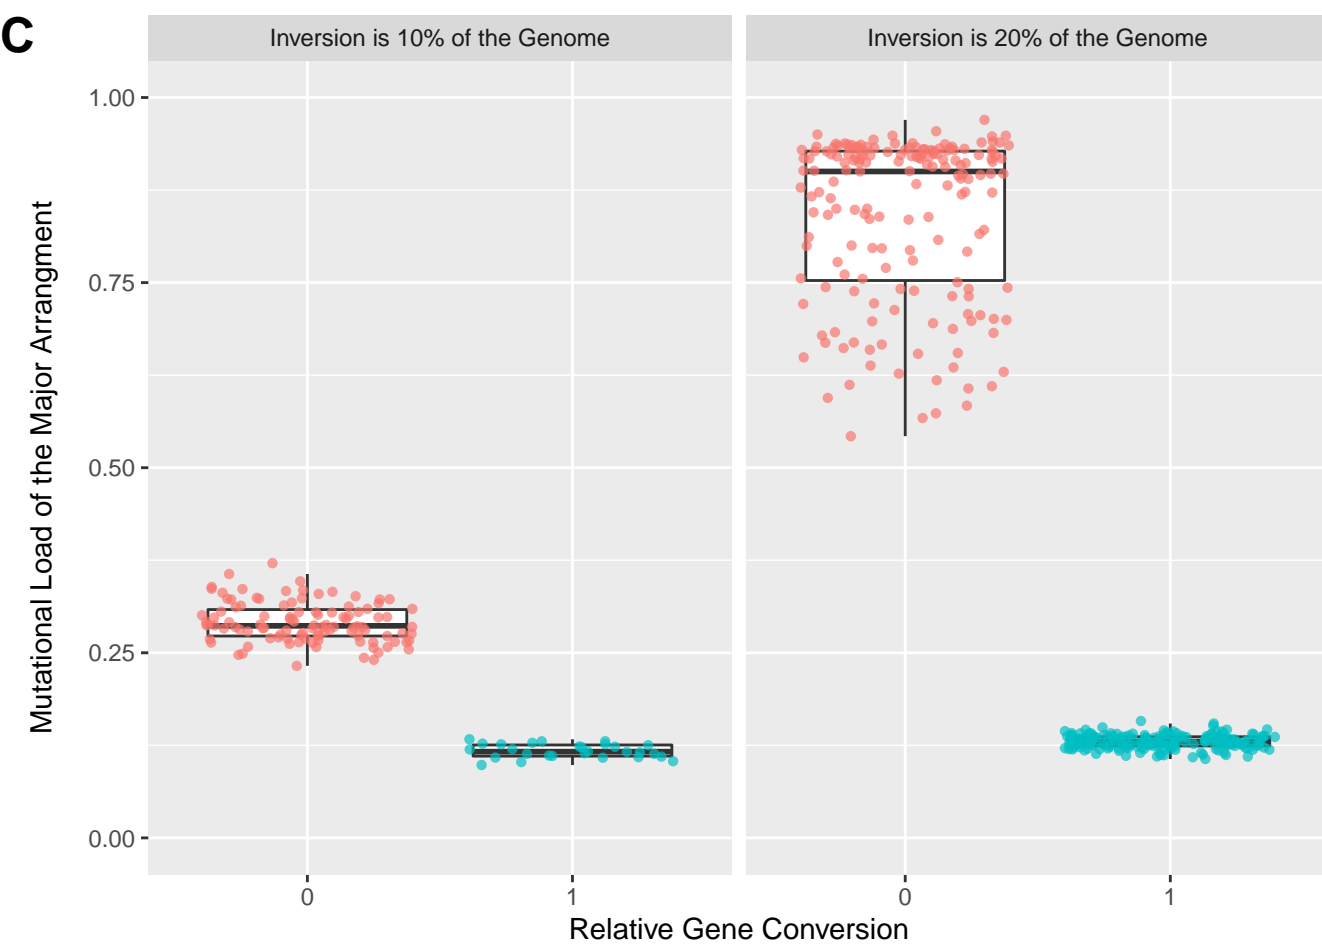**D**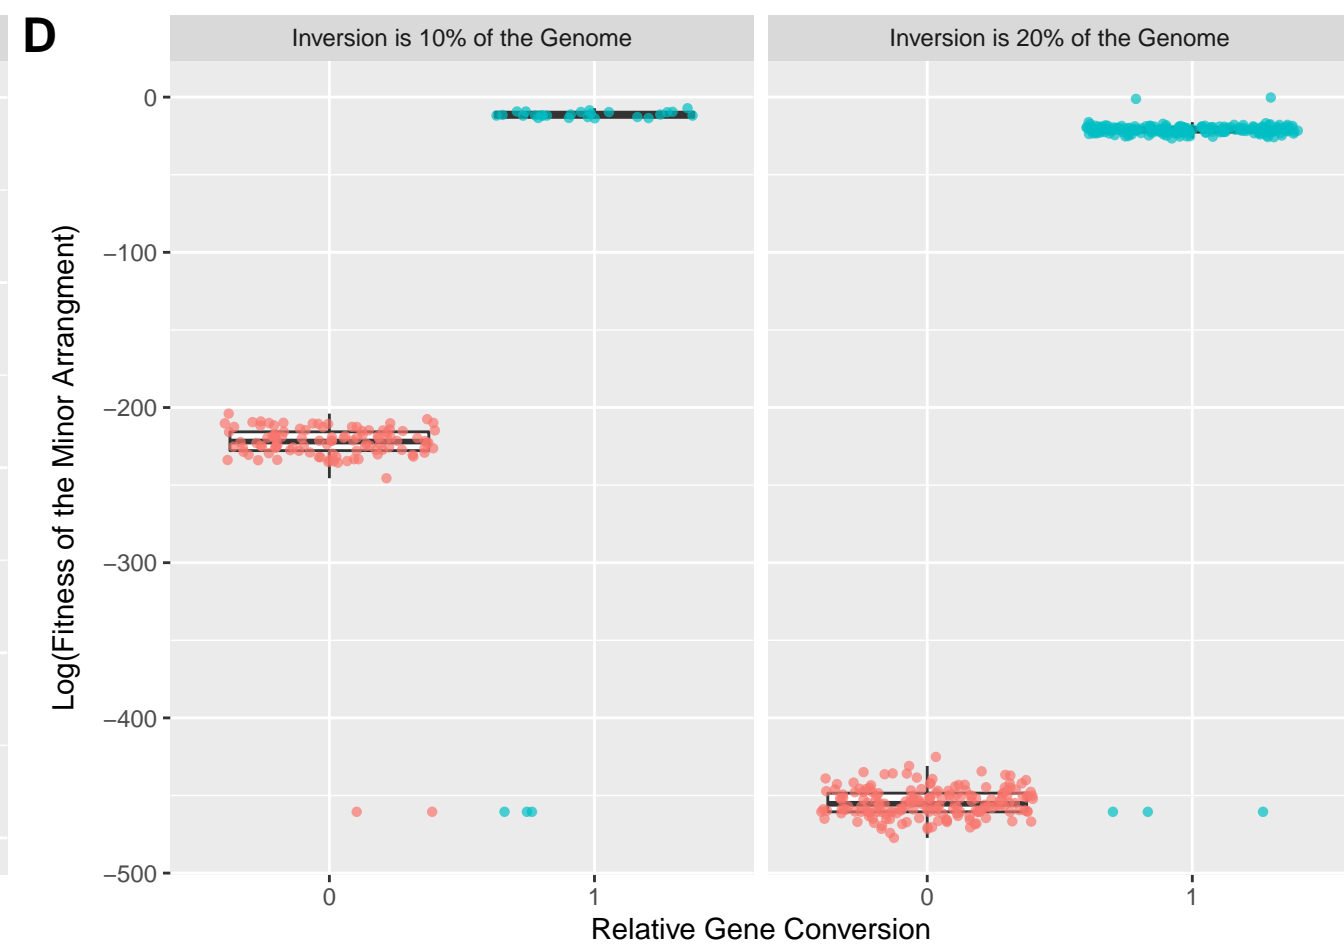

Supplement: pgen.1009411.s005.pdf [file pgen.1009411.s005.pdf]
