# Supplementary material for: Deleterious mutation accumulation and the long-term fate of chromosomal inversions
Source: PubMed Central journal article supplement (PMC7963061; doi:10.1371/journal.pgen.1009411), 2021-03-04

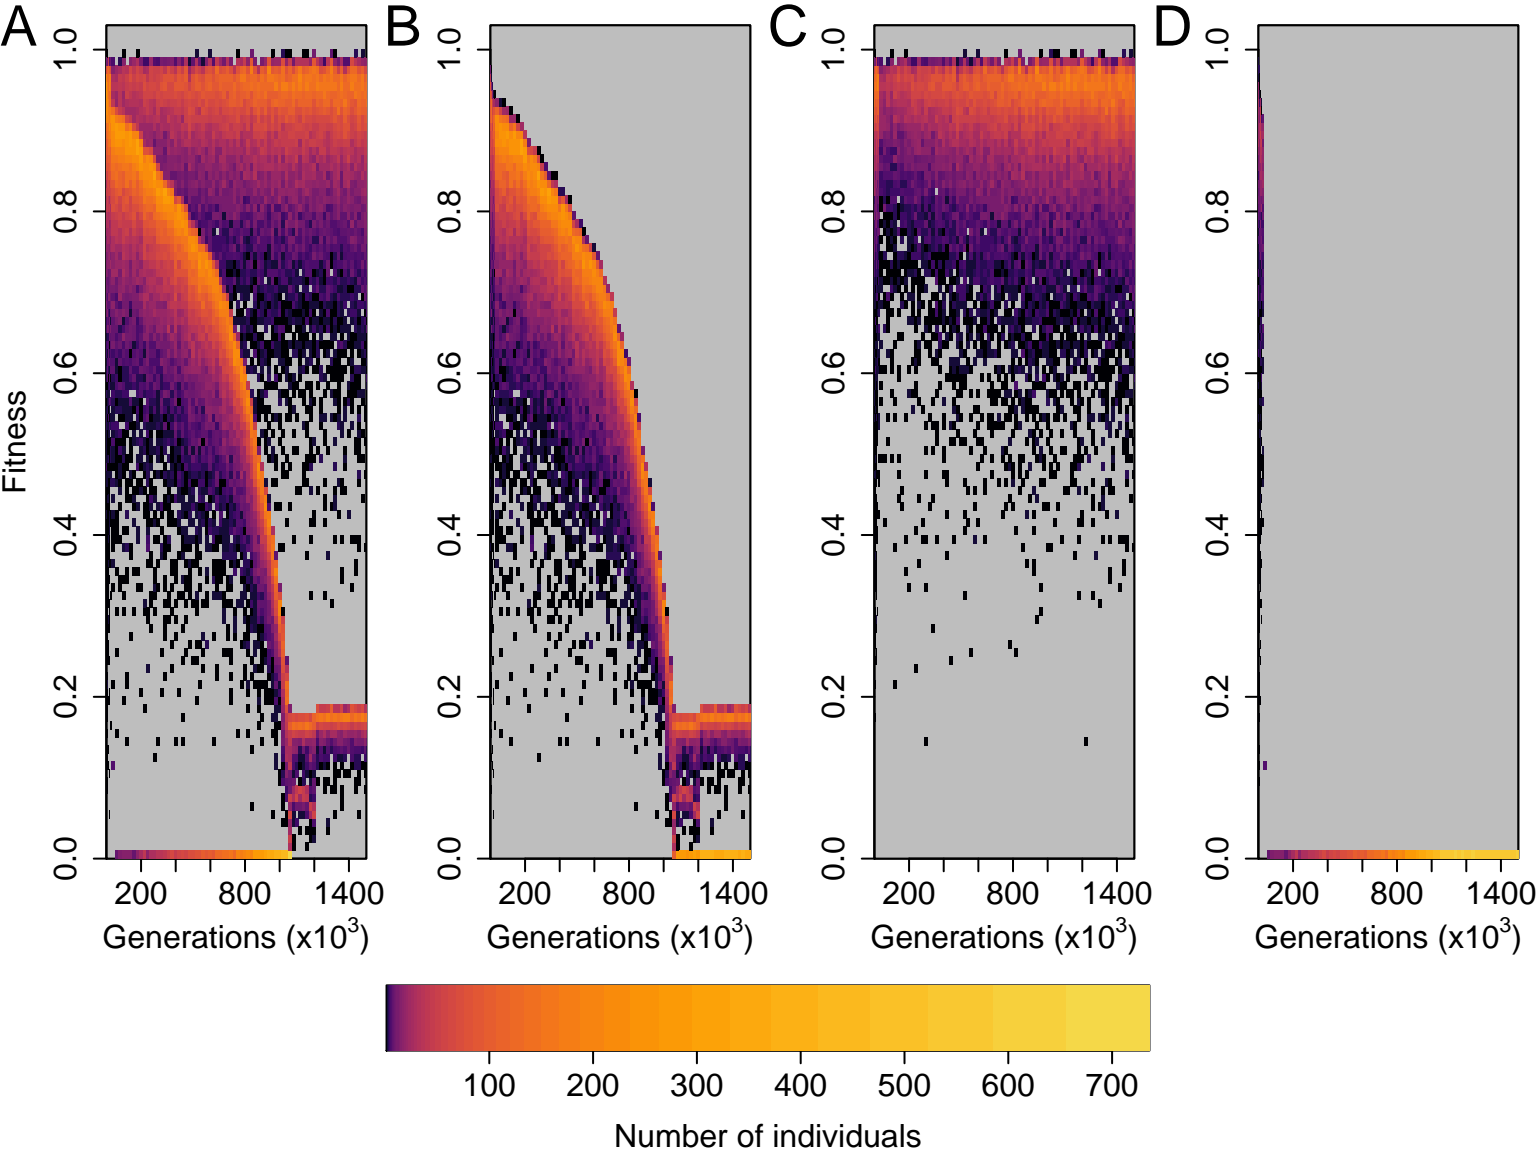

Supplement: pgen.1009411.s010.pdf [file pgen.1009411.s010.pdf]
